# Supplementary material for: Healthcare Use in Patients With Cardiovascular Disease and Depressive Symptoms – The Impact of Internet-Delivered Cognitive Behavioural Therapy. A Secondary Analysis of a RCT
Source: Research Square preprint supplement (doi:10.21203/rs.3.rs-858227/v1), 2021-09-14
Supplement: Supplementary file 2 [file a650a2a7a9d7580384457f78.docx]

**Highlights**

- Patients with CVD use outpatient healthcare services to a great extent
- Both iCBT and online discussion forum gave a decrease in healthcare use by one-third
- Reduced depressive symptom scores were associated with lower outpatient service use
- iCBT was not superior to online discussion forum in decreasing healthcare use
